# Supplementary material for: Baseline microbiota composition modulates antibiotic-mediated effects on the gut microbiota and host
Source: PubMed Central journal article supplement (PMC6676565; doi:10.1186/s40168-019-0725-3), 2019-08-02
Supplement: 40168_2019_725_MOESM7_ESM.pdf [file 40168_2019_725_MOESM7_ESM.pdf]

Pairwise Spearman

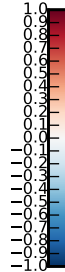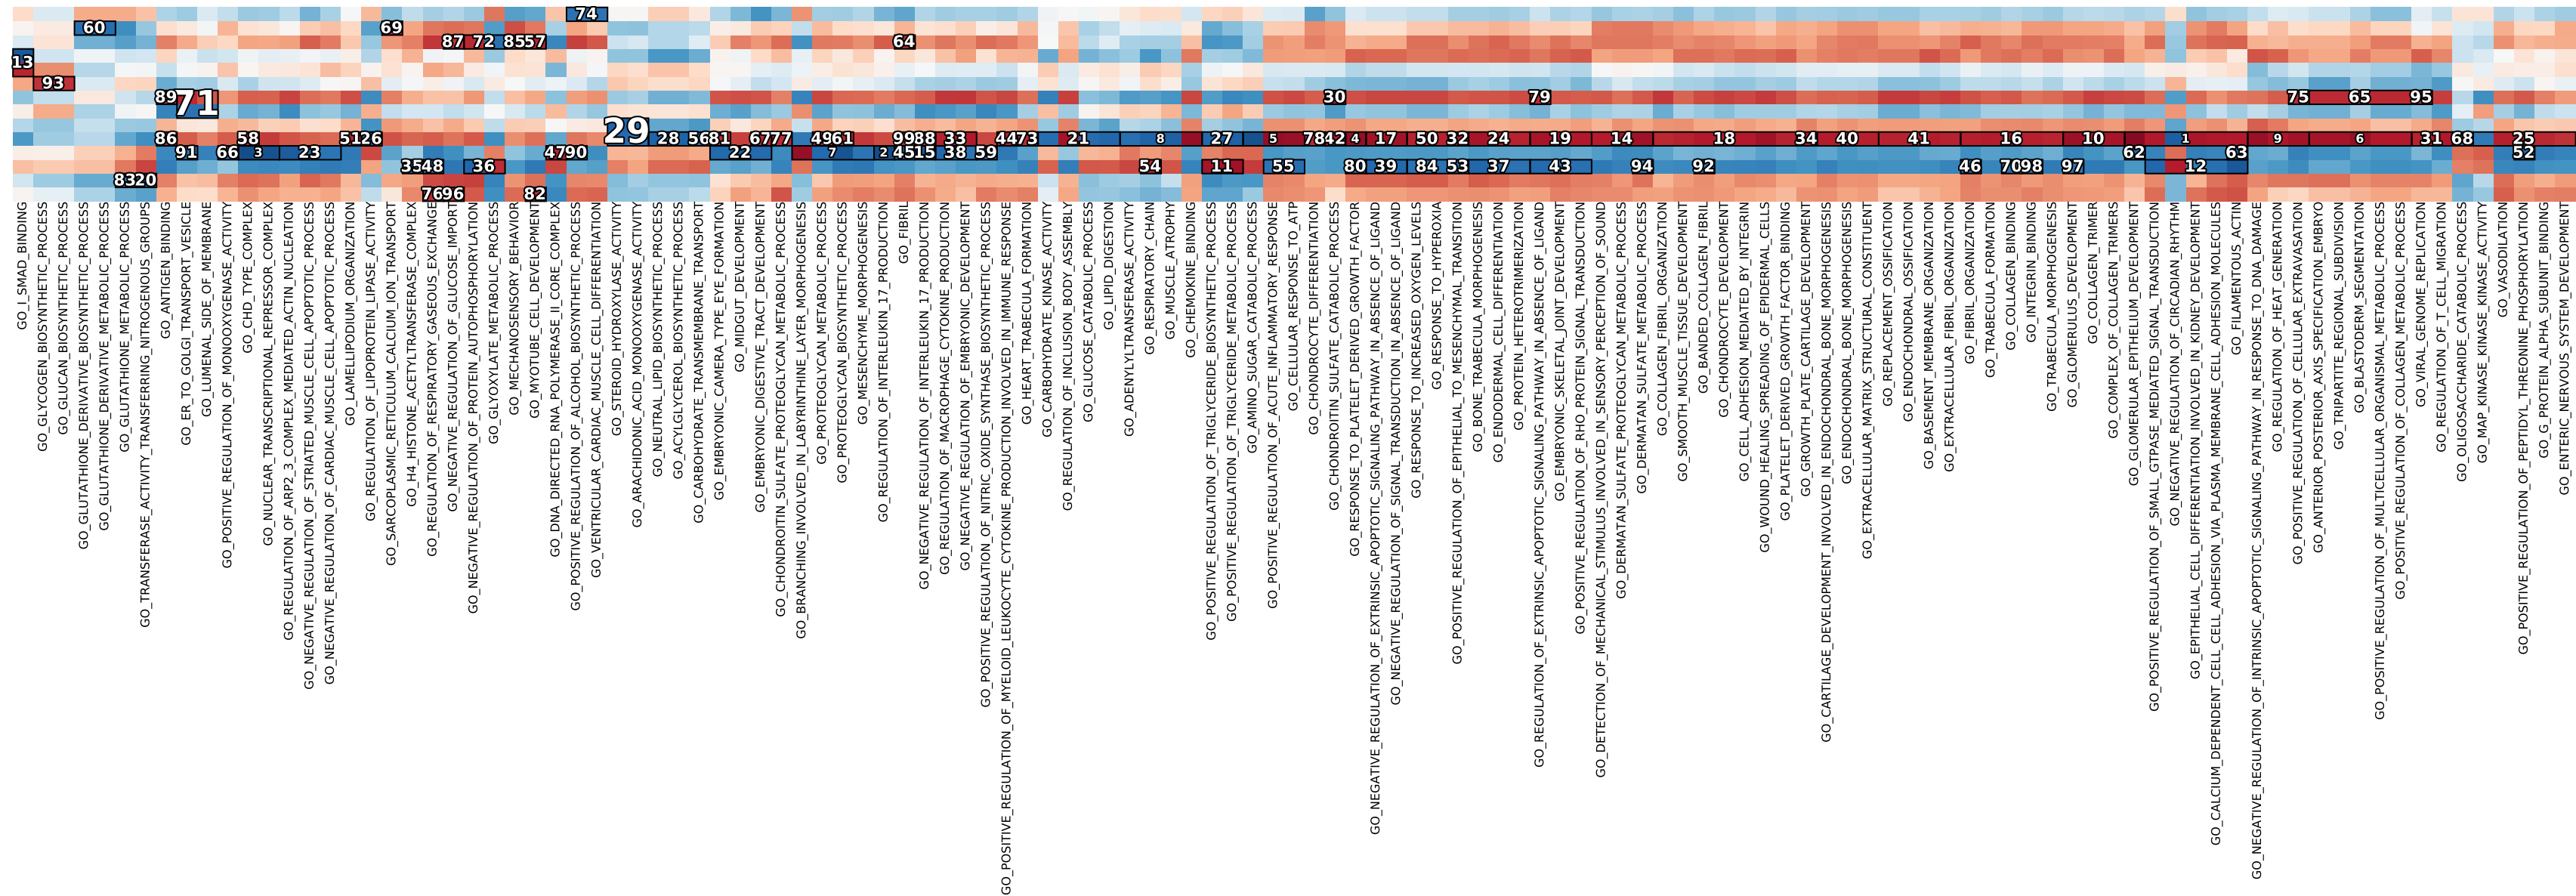

2nd dataset

Clostridium\_IV  
Intestinimonas  
Anaerotruncus  
Roseburia  
Pseudoflavonifractor  
Coproacter  
Faecalibacterium  
Barnesiella  
Anaerostipes  
Dorea  
Anaerosporbacter  
Prevotella  
Blautia  
Ruminococcus2

1st dataset
